# Supplementary material for: Endothelial IGF‐1 receptor mediates crosstalk with the gut wall to regulate microbiota in obesity
Source: PubMed Central journal article supplement (PMC8097321; doi:10.15252/embr.202050767), 2021-05-02

Figure 1D

IGF-1R (d23h3)

Bactin

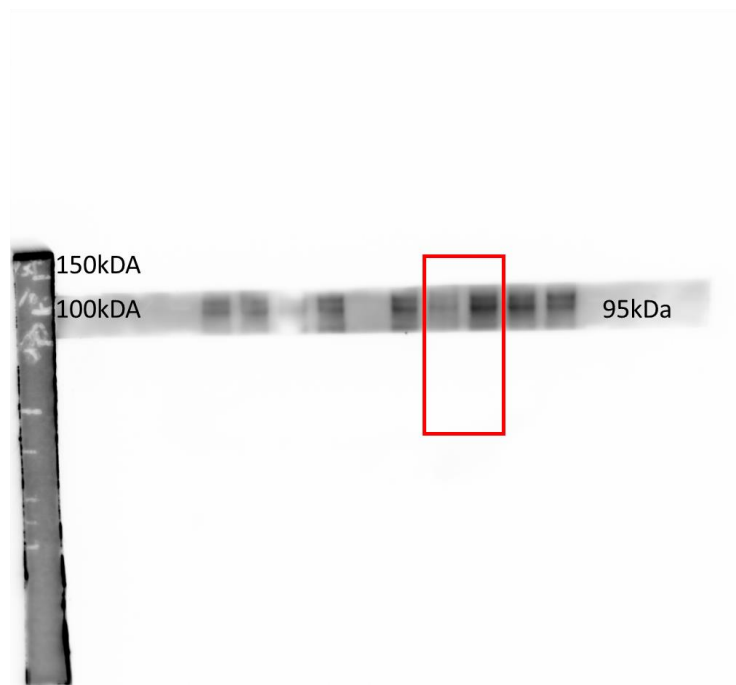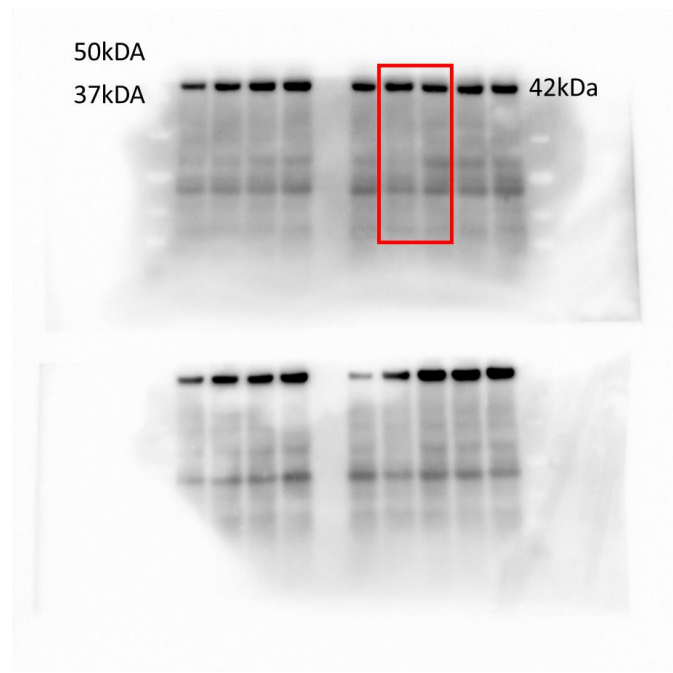

Figure 1E

IR (4b8)

Bactin

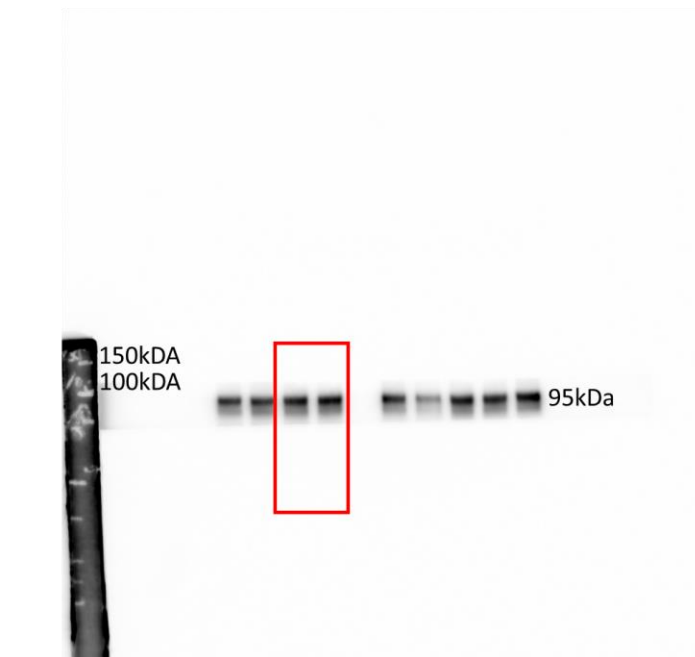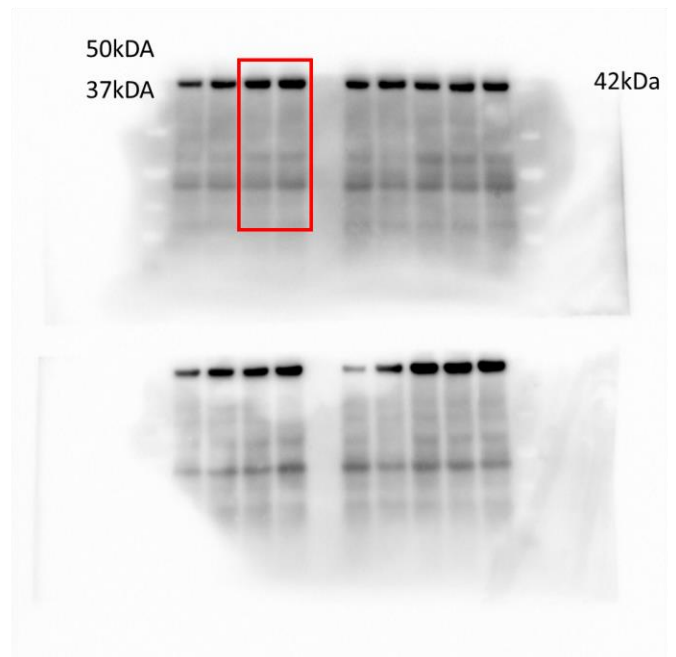

Supplement: EMBR-22-e50767-s003.pdf [file EMBR-22-e50767-s003.pdf]
